# Supplementary material for: Cost-effectiveness analysis of tislelizumab plus chemotherapy versus placebo plus chemotherapy as first-line treatment for advanced gastric or gastroesophageal junction adenocarcinoma: perspectives from the United States and China
Source: PubMed Central journal article supplement (PMC11614636; doi:10.3389/fphar.2024.1461571), 2024-11-20
Supplement: Image1.pdf [file Image1.pdf]

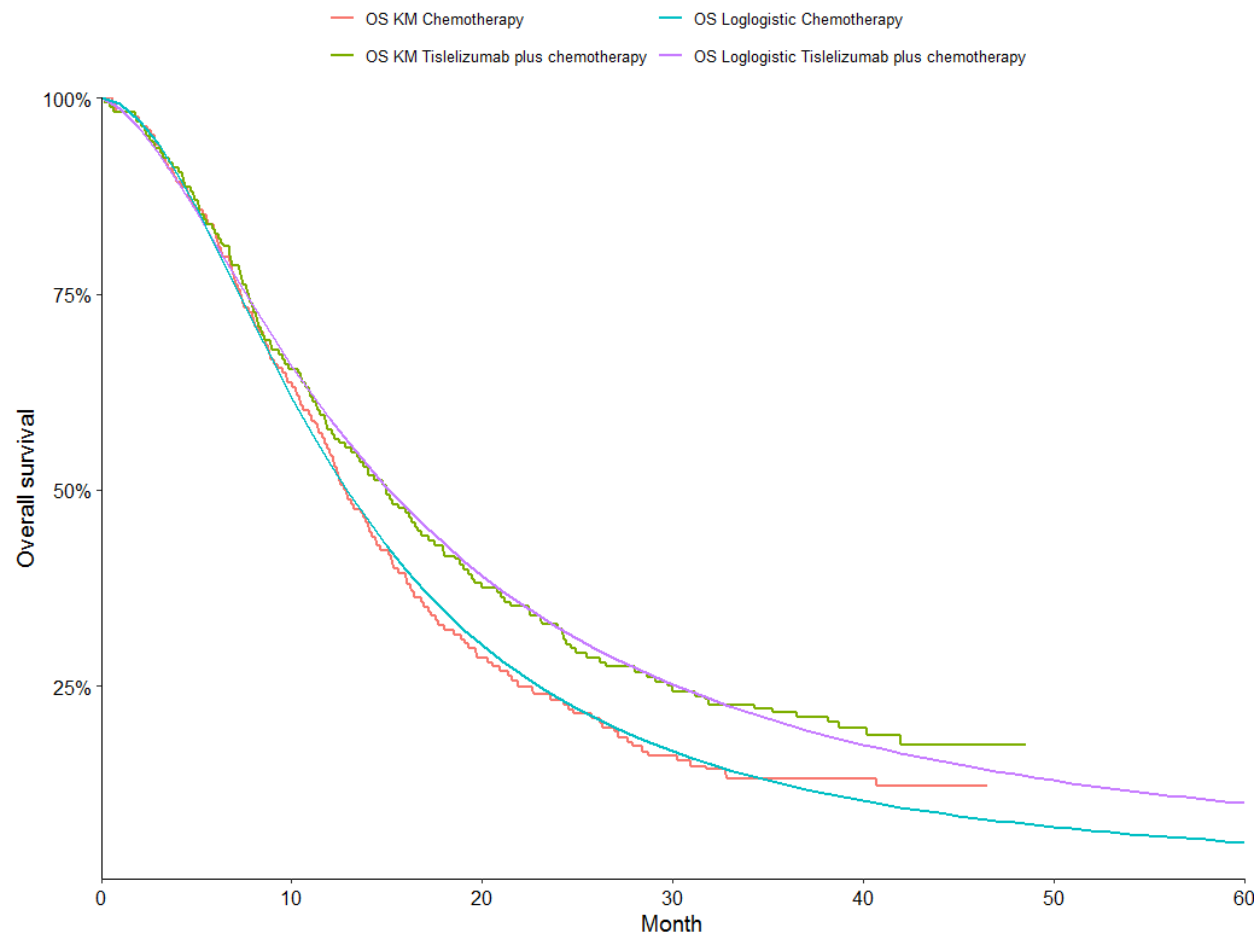

**Supplemental Figure 1.** The Kaplan-Meier overall survival curves

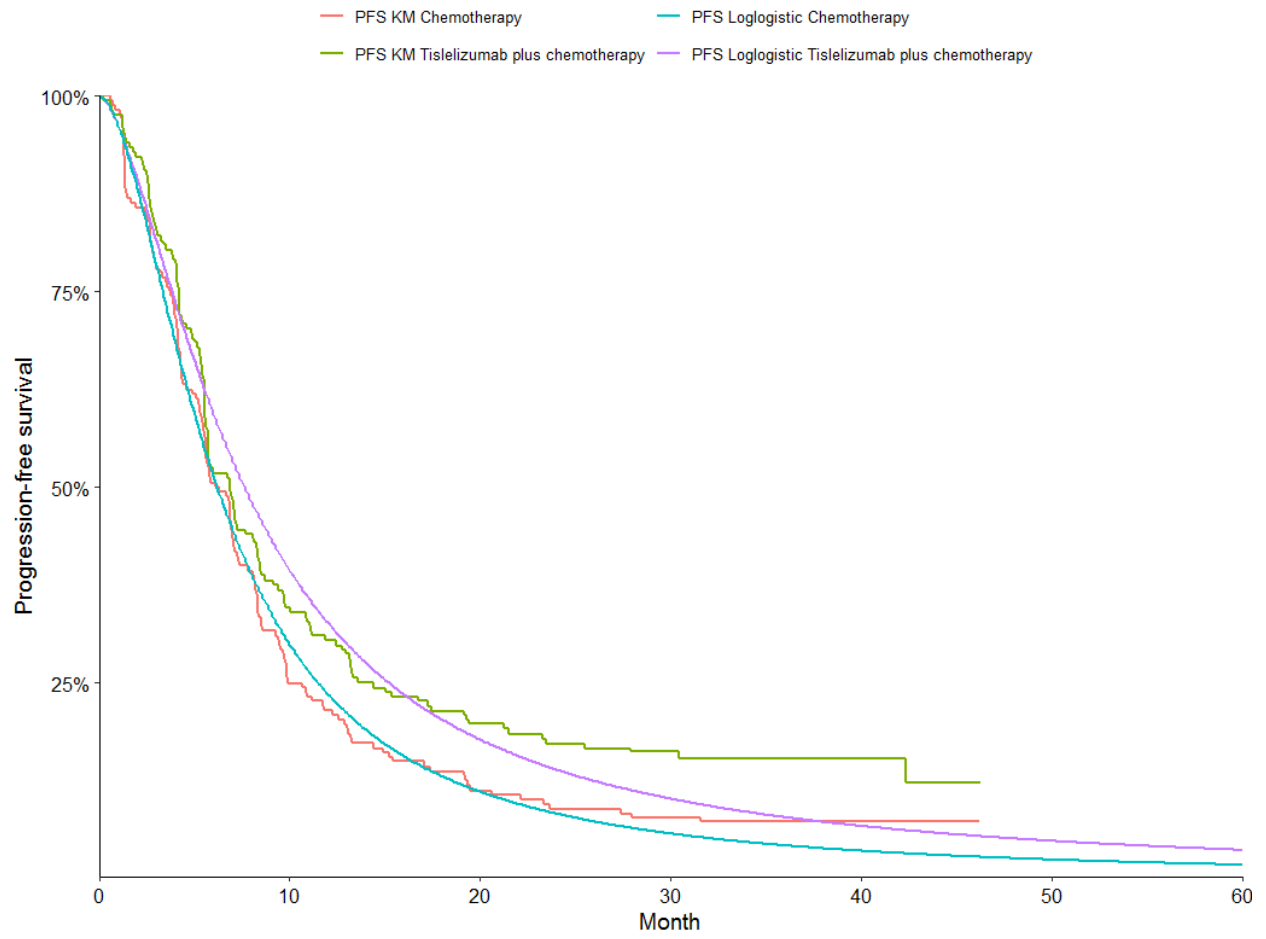

**Supplemental Figure 2.** The Kaplan-Meier progression-free survival curves

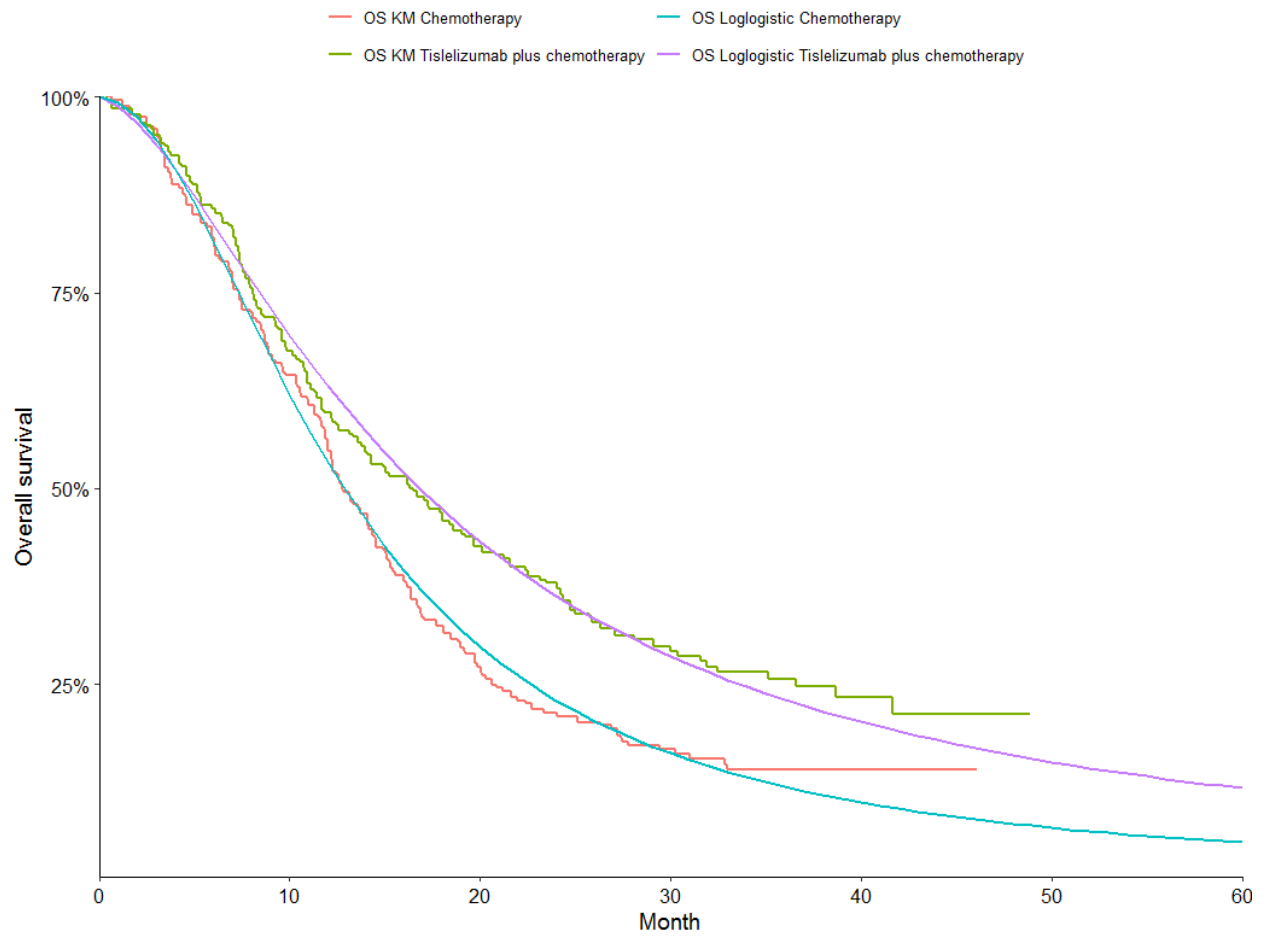

**Supplemental Figure 3.** The Kaplan-Meier overall survival curves in patients with  $TAP \geq 5\%$

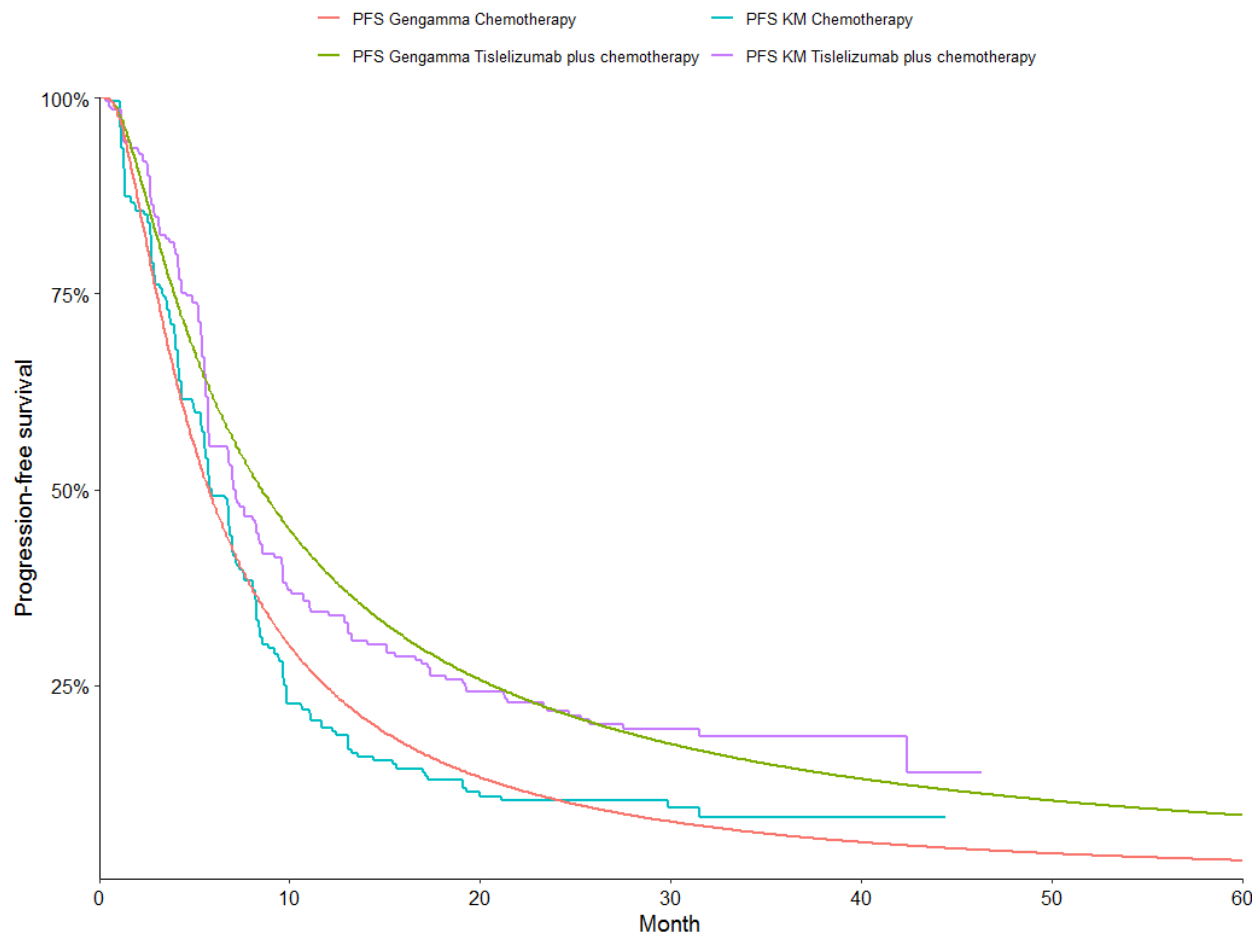

**Supplemental Figure 4.** The Kaplan-Meier progression-free survival curves in patients with TAP  $\geq 5\%$
